# Supplementary material
Source: ML conference proceedings conference paper supplement (https://openreview.net/forum?id=4NRjdISWby)

error

K = 300, r = 8

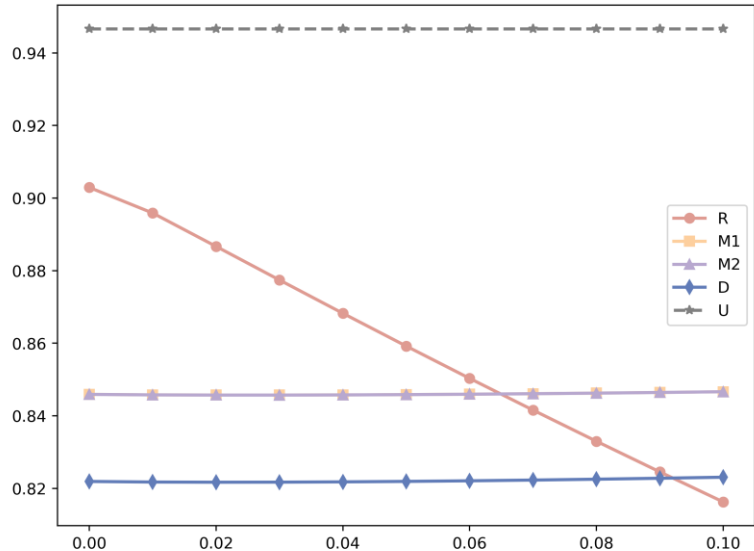

K = 300, r = 16

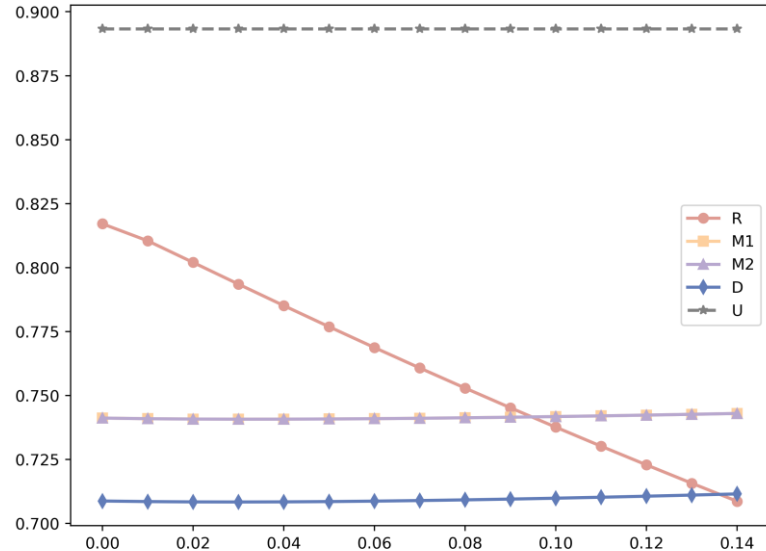

K = 300, r = 24

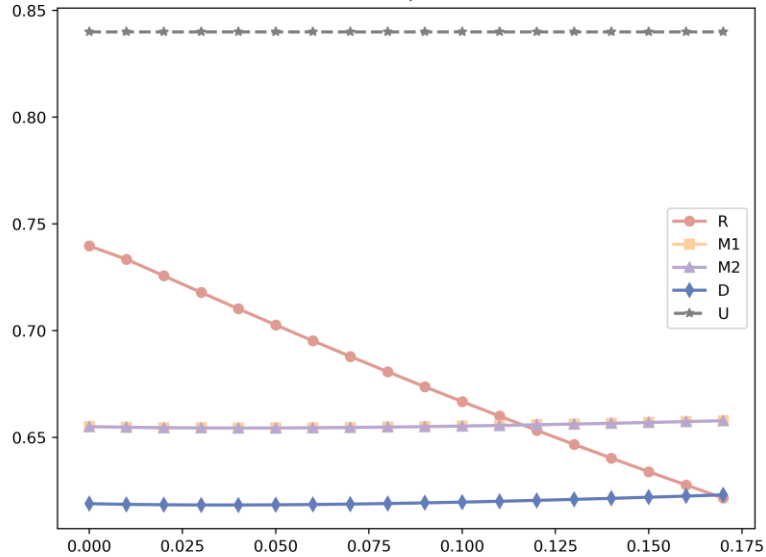

K = 300, r = 32

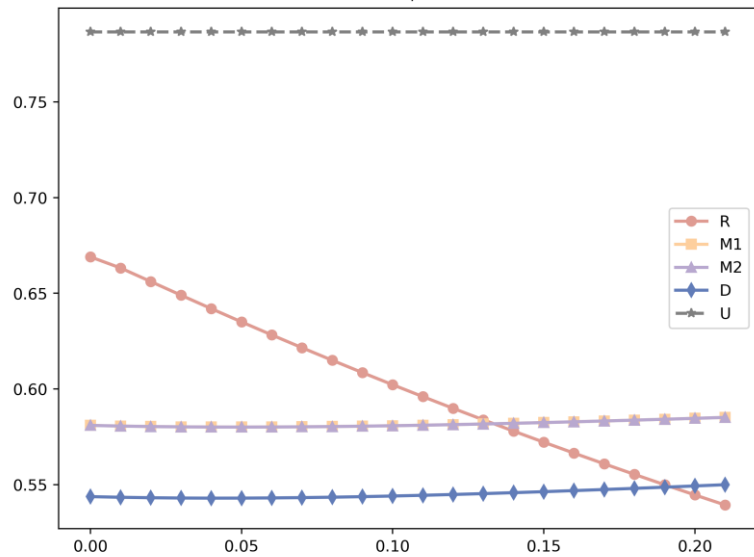

Correlation value

Supplement: supplementary_material [file attachment]
